# Simple, Time-Saving Dye Staining of Proteins for Sodium Dodecyl Sulfate–Polyacrylamide Gel Electrophoresis Using Coomassie Blue

Wei-Hua Dong, Tian-Yun Wang\*, Fang Wang, Jun-He Zhang

Department of Biochemistry and Molecular Biology, Xinxiang Medical University, Xinxiang, Henan, China

## Abstract

A fixation-free and fast protein-staining method for sodium dodecyl sulfate–polyacrylamide gel electrophoresis using Coomassie blue is described. The protocol comprises staining and quick washing steps, which can be completed in 0.5 h. It has a sensitivity of 10 ng, comparable with that of conventional Coomassie Brilliant Blue G staining with phosphoric acid in the staining solution. In addition, the dye stain does not contain any amount of acid and methanol, such as phosphoric acid. Considering the speed, simplicity, and low cost, the dye stain may be of more practical value than other dye-based protein stains in routine proteomic research.

**Citation:** Dong W-H, Wang T-Y, Wang F, Zhang J-H (2011) Simple, Time-Saving Dye Staining of Proteins for Sodium Dodecyl Sulfate–Polyacrylamide Gel Electrophoresis Using Coomassie Blue. PLoS ONE 6(8): e22394. doi:10.1371/journal.pone.0022394

**Editor:** Vladimir N. Uversky, University of South Florida, United States of America

**Received:** May 18, 2011; **Accepted:** June 20, 2011; **Published:** August 5, 2011

This is an open-access article, free of all copyright, and may be freely reproduced, distributed, transmitted, modified, built upon, or otherwise used by anyone for any lawful purpose. The work is made available under the Creative Commons CC0 public domain dedication.

**Funding:** This work was supported by the National Natural Science Foundation (30970055/C010202), [http://159.226.244.28/portal/Proj\\_List.asp](http://159.226.244.28/portal/Proj_List.asp). The funders had no role in study design, data collection and analysis, decision to publish, or preparation of the manuscript.

**Competing Interests:** The authors have declared that no competing interests exist.

\* E-mail: wtianyuncn@126.com

## Introduction

Polyacrylamide gel electrophoresis (PAGE) has become the most common method for protein analysis and detection in molecular biology experiments [1–4]. Subsequent to separation by electrophoresis, proteins in a gel are detected by several staining methods, such as Coomassie blue, silver, and fluorescent staining methods. [1]. Silver staining is one of the most sensitive protein-staining methods and could detect proteins at nanogram levels. However, it has the following disadvantages: difficulty in the operation and low repetition rate. Moreover, silver staining presents worse mass-spectrometry (MS) compatibility compared with the traditional Coomassie blue staining because it includes glutaraldehyde in the sensitization solution. It has also been noted as an MS-incompatible method. Fluorescent staining could detect proteins at the nanogram level without the requirement of special technical skill. At present, SYPRO orange, SYPRO red, Deep Purple, and Flamingo are frequently used in proteomics research. However, fluorescent staining is inconvenient because it requires special equipment, such as a fluorescent imaging scanner and an integrator [5–7].

In spite of the high sensitivity of silver staining and the wide dynamic range of various fluorescent detection methods, Coomassie Brilliant Blue (CBB) staining remains the most commonly used detection technique for proteins separated by electrophoresis [5,7]. CBB staining was first developed to stain proteins on a cellulose acetate sheet in 1963 [8]. Subsequently, a protocol for staining proteins in polyacrylamide gels using a methanol/acetic acid/water mixture (5:1:5) as solvent system for CBB R-250 was described [9–12]. Coomassie blue staining has the following advantages: low cost, visual inspection, easy operation, convenient scanning procedure for image acquisition, better suitability for

quantitative analysis than silver staining, and the capacity to allow possible modifications for fast or highly sensitive staining. Coomassie stain has become the key compound in Blue native PAGE in the last 10 years [13,14]. However, it still requires a long staining time, and the relatively complicated ingredients make its use inconvenient. In the present study, we present an improved method for in-gel staining of proteins, which has the advantage of speed over the conventional CBB staining, yet has a comparable sensitivity.

## Materials and Methods

### Reagents

Acrylamide and bis-acrylamide were purchased from Sigma (St. Louis, MO, USA). Bovine serum albumin (BSA) and CBB R-250 were purchased from Takara Co., Ltd., Japan. All reagents used were of analytical grade.

### Preparation of staining solution

CBB R-250 (500 mg) was dissolved in 1000 ml of distilled water by stirring for 2–4 h. Subsequently, the solution was heated to 50°C for complete dissolution of CBB R-250.

### Gel electrophoresis

The stacking and separating gels used were 3.0% and 10% polyacrylamide, respectively, with an acrylamide : bis-acrylamide ratio of 30:0.8. The running buffer was prepared from 25 mM Tris base, 0.2 M glycine, and 0.1% sodium dodecyl sulfate (SDS) with pH of 8.3. Concentrations of BSA were determined by the Bradford method [15]. Prior to electrophoresis, the samples were heated in the presence of sample buffer (70 mM Tris-HCl, pH 6.8, 11.4% glycerol, 3% SDS, 0.01% bromophenol blue, and

5%  $\beta$ -mercaptoethanol) at 100°C for 5 min in a boiling water bath [15]. Protein samples were loaded into the individual wells, and electrophoresis processed 1 mA/cm gel in the stacking gels and 2 mA/cm gel in the separating gels.

### Protein staining and image acquisition

After separation, the gels were carefully transferred to a steel tray filled with distilled water, heated to 100°C, and cooled to room temperature to remove the water. The staining solution was added into the gel, heated to 100°C, and kept at this temperature for 30–60 s. Subsequently, the stained gels were removed from the staining solution and boiled in distilled water for 30–60 s. The washing step was repeated several times. The gel images were acquired by Tocan 240 system (Tocan Biotechnology Corporation, Shanghai, China) in a UV-1 mode.

## Results and Discussion

### Sensitivity

The Neuhoff's Chinacolloidal Coomassie Blue G-250 staining has a detection limit of approximately 10 ng of protein per spot [16]. To evaluate the sensitivity of this approach, different concentrations of BSA samples were separated on SDS-PAGE. The results showed that this approach has a sensitivity of 10 ng, which is the same as the traditional Coomassie blue stains [16] and other fast Coomassie stains [15,17] (Fig. 1).

### Different acids

To evaluate whether the acids have any effects on the protocol, we used different acids, including hydrochloric acid, phosphoric acid, and acetic acid, to prepare the staining solution in the experiment. No significant difference was found between staining with different acids solutions and with no acid solution. The water solution with and without acid could dye the protein just as well in this staining protocol (Fig. 2, lane 3). All the traditional staining solutions contain methanol, acetic acid, or phosphoric acid which not only produce unpleasant smell but also cause environmental pollution. In the dye stain, no acids are needed for the staining solution preparation.

### Different time and temperature

Temperature is a very important factor for protein detection in the protocol. We compared the gel staining under different boiling times and different staining times at room temperature. Boiling for 30–60 s was found to be enough to obtain a clear band (Fig. 3). This indicates better time-saving ability compared with conventional Coomassie [16] and other fast Coomassie staining methods [15,17]. However, staining with this quick staining solution at room temperature was difficult, and no clear bands were acquired

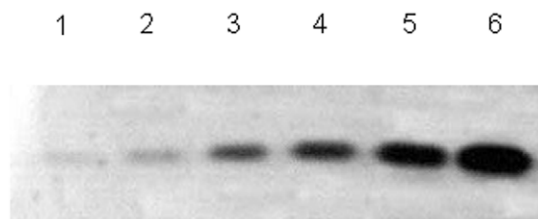

**Figure 1. Sensitivity of the described procedure.** Different concentrations of BSA were separated by SDS-PAGE and stained with water-soluble CBBR at boiling temperature for 60 s. Lanes 1–6 represent 10 ng, 100 ng, 500 ng, 1  $\mu$ g, 5  $\mu$ g, and 10  $\mu$ g of BSA. doi:10.1371/journal.pone.0022394.g001

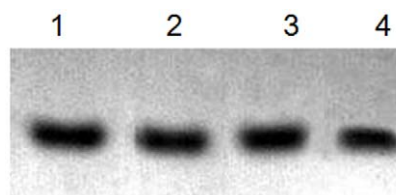

**Figure 2. Gels stained with different staining solutions.** BSA (500 ng) was separated by SDS-PAGE and stained with different acid-soluble CBBR at boiling temperature for 60 s. Added to the water-soluble CBBR staining solution were 0.3% HCl (Lane 1), 0.3% phosphoric acid (Lane 2), and 0.3% acetic acid (Lane 4), respectively. doi:10.1371/journal.pone.0022394.g002

even after staining for 24 h (Fig. 3, lane 7). The color of the bands and backgrounds became more unclear as the staining time increased. The backgrounds were very difficult to retain (Fig. 3). Therefore, boiling temperature was necessary to obtain a clear band and clean background.

CBB R-250 binding to proteins is mainly achieved by electrostatic interaction between sulfonic ( $\text{SO}_3^-$ ) group of dyes and protonated ( $\text{NH}_3^+$ ) groups of proteins. Additionally, van der Waals forces and hydrogen bonding contribute to the binding interaction between dye and protein [18]. The mechanism for hot fast CBB staining with the rise of temperature is possibly because of the increasing speed of the molecules of the dye and proteins. In addition, the collision chance of the sulfonic ( $\text{SO}_3^-$ ) group of dyes and protonated ( $\text{NH}_3^+$ ) groups of proteins increases at boiling temperature, resulting in easier staining of the bands of proteins.

### Water purity

Washing before staining is necessary to prepare a clean background. Different types of water were used to wash the gels. We found that water has slight effect on the staining results (Fig. 4). When the gels were washed using tap water, the bands were clear, but the sensitivity was worse than those of the bands washed with distilled water and double-distilled water (Fig. 4, lane 1). There was no significant difference between washing with distilled water and washing with double-distilled water.

In conclusion, the protocol described in the present study has four advantages: simplicity, low cost, environmental friendliness, and time-saving ability. Moreover, the protocol required only two reagents (Coomassie blue and distilled water) for the staining solution; fixing and destaining are performed only with distilled water. Traditional staining processes require many reagents, such as EtOH or MeOH, HAc, glutaraldehyde, NaAc, formalin,  $\text{Na}_2\text{CO}_3$ , EDTA,  $\text{AgNO}_3$ , etc. [16]. These reagents are not only expensive but also cause environmental pollution. Our method does not require the use of any acid and methanol nor tricarboxylic acid. With the minimal pollution produced, it can

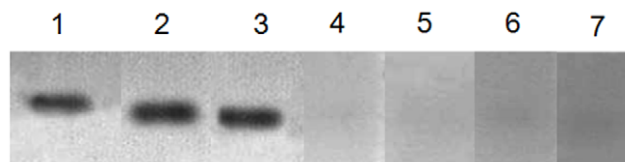

**Figure 3. Gels stained at different time periods.** BSA (500 ng) was separated by SDS-PAGE and stained with water-soluble CBBR solution at boiling temperature for 30 s (Lane 1), 60 s (Lane 2), and 120 s (Lane 3) and at room temperature for 1 h (Lane 4), 6 h (Lane 5), 14 h (Lane 6), and 24 h (Lane 7). doi:10.1371/journal.pone.0022394.g003

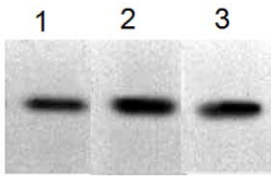

**Figure 4. Gel washing with different types of water.** BSA (500 ng) was separated by SDS-PAGE, and the separated gels were washed with different types of water: running water (Lane 1), distilled water (Lane 2), and double-distilled water (Lane 3) and stained with water-soluble CBBR solution at boiling temperature for 60 s. doi:10.1371/journal.pone.0022394.g004

be considered as more environment friendly than the other protein-staining methods [15–17]. The protocol includes only staining and quick washing steps, whereas traditional post-electrophoretic process is time consuming and cumbersome because it involves fixing, staining of protein gels, and destaining, and requires several hours to several days to finish the whole staining process [19–21]. The protocol described in the present

study is faster than colloidal staining and other fast staining procedures [15,17]. The whole post-electrophoretic process can be finished within 30 min. Thus, it is more time-saving compared with any other protein-staining methods. Despite the advantages of simplicity, time-saving ability, and environmental friendliness, several disadvantages exist, such as the need to boil the staining solution, unclear background, etc. The protocol requires keeping staining solution at a boiling temperature. Therefore, we suggest boiling the solution at a lower temperature to avoid breakage of the sheet. Increasing the purity or lengthening the destaining time from 10 to 12 h can produce a clearer background. The addition of 10% acetic acid to the destaining solution can also help in achieving better destaining effects.

### Author Contributions

Conceived and designed the experiments: TYW. Performed the experiments: WHD. Analyzed the data: FW. Contributed reagents/materials/analysis tools: FW JHZ. Wrote the paper: TYW WHD. Provided instruments: WZ YSZ LYZ.

### References

- Walker J, ed. (2002) The Protein Protocols Handbook (2nd Ed.) Humana Press Totowa. pp 61–67.
- Shofuda K, Nagashima Y, Kawahara K, Yasumitsu H, Miki K, et al. (1998) Elevated expression of membrane-type 1 and 3 matrix metalloproteinases in rat vascular smooth muscle cells activated by arterial injury. *Lab Invest* 78: 915–923.
- Kawsar S, Fujii Y, Matsumoto R, Ichikawa T, Tateno H, et al. (2008) Isolation, purification, characterization and glycan-binding profile of a d-galactoside specific lectin from the marine sponge, *Halichondria okadae*. *Comp Biochem Physiol B Biochem Mol Biol* 150: 349–357.
- Kawsar S, Takeuchi T, Kasai K, Fujii Y, Matsumoto R, et al. (2009) Glycan-binding profile of a D-galactose binding lectin purified from the annelid, *Perinereis nuntia* var. *vallata*. *Comp Biochem Physiol B Biochem Mol Biol* 152: 382–389.
- Yasumitsu H, Ozeki Y, Kawasar SM, Fujii Y, Sakagami M, et al. (2010) RAMA stain: A fast, sensitive and less protein-modifying CBB R250 stain. *Electrophoresis* 31: 1913–1917.
- Berggren KN, Schulenberg B, Lopez MF, Steinberg TH, Bogdanova A, et al. (2002) An improved formulation of SYPRO Ruby protein gel stain: Comparison with the original formulation and with a ruthenium II tris (bathophenanthroline disulfonate) formulation. *Proteomics* 2: 486–498.
- Candiano G, Bruschi M, Musante L, Santucci L, Ghiggeri M, et al. (2004) Blue silver: A very sensitive colloidal Coomassie G-250 staining for proteome analysis. *Electrophoresis* 25: 1327–1333.
- Fazekas D, Groth S, Webster G, Datyner A (1963) Two new staining procedures for quantitative estimation of proteins on electrophoretic strips. *Biochim Biophys Acta* 71: 377–391.
- Merril C, Goldman D, Sedman S, Ebert M (1980) Ultrasensitive stain for proteins in polyacrylamide gels shows regional variation in cerebrospinal fluid proteins. *Science* 211: 1437–1438.
- Weber K, Osborn M (1969) The reliability of molecular weight determinations by dodecyl sulfate-polyacrylamide gel electrophoresis. *Biochem J* 124: 4406–4412.
- Bennet J, Scott J (1971) Quantitative staining of fraction 1 protein in polyacrylamide gels using Coomassie Brilliant Blue. *Anal Biochem* 43: 173–182.
- Bertolini M, Tankersley L, Schroeder D (1976) Staining and destaining polyacrylamide gels: a comparison of Coomassie Blue and fast green protein dyes. *Anal Biochem* 71: 6–13.
- Kalivarathan D, Vijayan S, Sridhar B, Krishnamurthy S, Pennathur G (2011) In-Gel Staining of Proteins in Native Poly Acryl Amide Gel Electrophoresis Using Tetrakis(4-sulfonato phenyl)porphyrin. *Anal Sci* 27: 101–103.
- Pink M, Verma N, Rettenmeier AW, Schmitz-Spanke S (2010) CBB staining protocol with higher sensitivity and mass spectrometric compatibility. *Electrophoresis* 31: 593–598.
- Jung C, Sang Y, Hee H, Dong C, Gyurmg Y (1996) A modified Coomassie blue staining of proteins in polyacrylamide gels with Bismark brown R. *Anal Biochem* 236: 82–84.
- Lin JF, Chen QX, Tian HY, Gao X, Yu ML, et al. (2008) Stain efficiency and MALDI-TOF MS compatibility of seven visible staining procedures. *Anal Bioanal Chem* 390: 1765–1773.
- Dyballa N, Metzger S (2009) Fast and sensitive colloidal coomassie G-250 staining for proteins in polyacrylamide gels. *J Vis Exp* 3: pii: 1431.
- Choi JK, Yoo GS (2002) Fast protein staining in sodium dodecyl sulfate polyacrylamide gel using counter ion-dyes, Coomassie brilliant blue R-250 and neutral red. *Arch Pharm Res* 5: 704–708.
- Neuhoff V, Arold N, Taube D, Ehrhardt W (1988) Improved staining of proteins in polyacrylamide gels including isoelectric focusing gels with clear background at nanogram sensitivity using Coomassie Brilliant Blue G-250 and R-250. *Electrophoresis* 9: 255–262.
- Wang X, Li X, Li Y (2007) A modified Coomassie Brilliant Blue staining method at nanogram sensitivity compatible with proteomic analysis. *Biotechnol Lett* 29: 1599–1603.
- Lawrence AM, Besir HU (2009) Staining of proteins in gels with coomassie G-250 without organic solvent and acetic acid. *J Vis Exp* 14: pii: 1350.
